# Supplementary material for: Hydroboration of CO2 catalyzed by heteroscorpionate zwitterionic zinc and magnesium hydride complexes
Source: Royal Society of Chemistry journal article supplement (doi:10.1039/d2dt00279e), 2022-01-01
Supplement: d2dt00279e1.pdf [file d2dt00279e1.pdf]

## Supporting information:

### 1. Synthetic procedures

#### a. General procedures

All reactions were done under an inert atmosphere of argon using Schlenk and glovebox techniques with dry and deoxygenated solvents. Hexane and toluene were purified using an SPS Braun system. THF was dried by distillation over sodium/benzophenone under a nitrogen atmosphere and was stored over freshly cut sodium in a glovebox.  $^1\text{H}$  and  $^{31}\text{P}$  NMR spectra were recorded using a Bruker AV400 spectrometer.  $\text{Ph}_3\text{SiMe}$  is used as internal references relative to  $-\text{SiMe}$  for  $^1\text{H}$  ( $\text{C}_6\text{D}_6$ ;  $\delta = 0.72$  ppm) chemical shifts (ppm). All other reagents and chemicals were obtained commercially and used as received.

#### b. X-ray Crystallographic Studies.

Crystals for X-ray analysis were obtained as described in the preparations. The crystals were manipulated in a glovebox. Data collections were performed at  $-88.5$  °C on a Bruker SMART APEX diffractometer with a CCD area detector, using graphite-monochromated Mo  $K\alpha$  radiation ( $\lambda = 0.71073$  Å). The determination of crystal class and unit cell parameters was carried out by the SMART program package [1]. The raw frame data were processed using SAINT and SADABS to yield the reflection data file [2]. The structures were solved by using the SHELXTL program [3]. Refinement was performed on  $F^2$  anisotropically for all non-hydrogen atoms by the full-matrix least-squares method. The hydrogen atoms were placed at calculated positions and were included in the structure calculations without the further refinement of the parameters. The terminal hydrogen atom in complex **2** has been refined anisotropically. Molecular structures were generated using the OLEX 2 program.

#### c. Synthesis of Zinc Hydride Complex LZnH (**2**).

To a solution of zinc benzyloxy complex **1** (0.52 g, 0.8 mmol) in THF was added  $\text{PhSiH}_3$  (0.108 g, 1.0 mmol) or  $(\text{EtO})_3\text{SiH}$  (0.164 g, 1.0 mmol), and the mixture was stirred for 10 h at room temperature. The volatile was removed under reduced pressure, and hexane (5 mL) was added. The white precipitate was isolated by filtration and dried under vacuum (yield, 0.33 g, 76%). Anal. Calcd for  $\text{C}_{29}\text{H}_{30}\text{N}_5\text{PZn}$ : C, 63.92; H, 5.55; N, 12.85. Found: C, 63.88; H, 5.50; N, 12.83.  $^1\text{H}$  NMR (500 MHz,  $\text{C}_6\text{D}_6$ ):  $\delta$  7.73-7.69 (m, 4H; *o*-PPh<sub>2</sub>), 7.53 (d,  $^3J_{\text{H-H}} = 8.1$  Hz, 2H; *o*-NPh), 7.03-6.89 (m, 8H; PhH), 6.66 (t,  $^3J_{\text{H-H}} = 7.3$  Hz, 1H; *p*-NPh), 5.39 (d,  $^3J_{\text{P-H}} = 2.4$  Hz, 1H; Zn-H), 5.29 (s, 2H; Pz-H), 2.22 (s, 6H; Pz-CH<sub>3</sub>), 1.89 ppm (s, 6H; Pz-CH<sub>3</sub>).  $^{31}\text{P}$  NMR (162 MHz,  $\text{C}_6\text{D}_6$ ):  $\delta$  20.8 ppm.

#### d. Synthesis of formate Complex LZnOCHO (**3**).

In a Schlenk tube, a solution of complex **2** (0.163 g, 0.3 mmol) of toluene (8 mL) was frozen in a liquid nitrogen bath under vacuum, and  $\sim 2$  bar of  $\text{CO}_2$  was added. The mixture was stirred for 3 h at room temperature and concentrated to about 1.0 mL;

then, several drops of hexane were added. White crystals were obtained at  $-30\text{ }^{\circ}\text{C}$  2 days later (yield, 0.081 g, 46%). Anal. Calcd for  $\text{C}_{30}\text{H}_{30}\text{N}_5\text{O}_2\text{PZn}$ : C, 61.18; H, 5.13; N, 11.89%. Found: C, 61.20; H, 5.11; N, 11.93%.  $^1\text{H}$  NMR (500 MHz,  $\text{C}_6\text{D}_6$ ):  $\delta$  9.13 (s, 1H; OCHO), 7.68-7.64 (m, 4H; *m*-PPh<sub>2</sub>), 7.33 (d,  $^3\text{J}_{\text{H-H}} = 8.4$  Hz, 2H; *o*-NPh), 7.06-6.86 (m, 8H; Ph-H), 6.65 (t,  $^3\text{J}_{\text{H-H}} = 7.4$  Hz, 1H; *p*-NPh), 5.24 (s, 2H; Pz-H), 2.33 (s, 6H; Pz-CH<sub>3</sub>), 1.83 ppm (s, 6H; Pz-CH<sub>3</sub>).  $^{31}\text{P}$  NMR (162 MHz,  $\text{C}_6\text{D}_6$ ):  $\delta$  22.71 ppm.

e. Synthesis of Magnesium Hydride Complex LMgH (**5**)

To a solution of *n*-butyl Magnesium complex **4** (0.384 g, 0.8 mmol) in toluene was added  $\text{PhSiH}_3$  (0.108 g, 1 mmol). The mixture was reacted for 12h at room temperature. The white precipitate was isolated by filtration, washed by hexane and dried under vacuum (yield, 0.181 g, 45%). Anal. Calcd for  $\text{C}_{29}\text{H}_{30}\text{N}_5\text{O}_2\text{PMg}$ : C, 69.13; H, 6.00; N, 13.90%. Found: C, 69.20; H, 5.96; N, 13.93%.  $^1\text{H}$  NMR (500 MHz,  $\text{C}_6\text{D}_6$ ):  $\delta$  7.90-7.86 (m, 4H; *o*-PPh<sub>2</sub>), 7.53 (d,  $^3\text{J}_{\text{H-H}} = 8.3$  Hz, 2H; *o*-NPh), 7.02-6.85 (m, 8H; PhH), 6.50 (t,  $^3\text{J}_{\text{H-H}} = 7.3$  Hz, 1H; *p*-NPh), 6.19 (s, 1H; Mg-H), 5.45 (s, 2H; Pz-H), 2.56 (s, 6H; Pz-CH<sub>3</sub>), 1.96 ppm (s, 6H; Pz-CH<sub>3</sub>).  $^{31}\text{P}$  NMR (162 MHz,  $\text{C}_6\text{D}_6$ ):  $\delta$  17.82 ppm.

f. Catalytic Hydroboration Reaction of  $\text{CO}_2$  with Zinc Hydride Complex **2**.

0.01 mmol of the base catalyst was dissolved in  $\text{C}_6\text{D}_6$  (~ 1 ml) in a Schlenk tube. The required amount of  $\text{BH}_3\cdot\text{SMe}_2$  was then added. The Schlenk tube was frozen in a liquid nitrogen bath under vacuum, and ~2 bar of  $\text{CO}_2$  was added. The reaction was followed by NMR spectroscopy. The yields reported by  $^1\text{H}$  NMR were according to the integration of both  $\text{B}(\text{OMe})_3$  at 3.44 ppm and  $(\text{OBOMe})_3$  at 3.34 ppm and compared to the -SiMe of the  $\text{Ph}_3\text{SiMe}$  at 0.70 ppm<sup>[4, 5]</sup>.

## 2. X-ray crystallography

**Table S1** Crystal data and structure refinement details for complexes **3**.

| Parameter             | <b>2</b> ·( <b>Toluene</b> ) <sub>3</sub>                  |
|-----------------------|------------------------------------------------------------|
| Empirical formula     | $\text{C}_{44}\text{H}_{47}\text{N}_5\text{O}_2\text{PZn}$ |
| Formula weight        | 774.20                                                     |
| Temperature/K         | 173                                                        |
| Crystal system        | triclinic                                                  |
| Space group           | P-1                                                        |
| <i>a</i> /Å           | 9.9364(6)                                                  |
| <i>b</i> /Å           | 12.6486(8)                                                 |
| <i>c</i> /Å           | 16.9877(11)                                                |
| $\alpha/^\circ$       | 108.9870(10)                                               |
| $\beta/^\circ$        | 97.2460(10)                                                |
| $\gamma/^\circ$       | 96.9120(10)                                                |
| Volume/Å <sup>3</sup> | 1972.9(2)                                                  |
| Z                     | 2                                                          |

|                                                |                                                               |
|------------------------------------------------|---------------------------------------------------------------|
| $\rho_{\text{calc}}/\text{cm}^3$               | 1.303                                                         |
| $\mu/\text{mm}^{-1}$                           | 0.706                                                         |
| F(000)                                         | 814.0                                                         |
| Crystal size/ $\text{mm}^3$                    | $0.3 \times 0.2 \times 0.1$                                   |
| Radiation                                      | MoK $\alpha$ ( $\lambda = 0.71073$ )                          |
| 2 $\theta$ range for data collection/          | 3.456 to 52.87                                                |
| Index ranges                                   | $-12 \leq h \leq 11, -15 \leq k \leq 15, -21 \leq l \leq 13$  |
| Reflections collected                          | 11375                                                         |
| Independent reflections                        | 7887 [ $R_{\text{int}} = 0.0152, R_{\text{sigma}} = 0.0298$ ] |
| Data/restraints/parameters                     | 7887/272/524                                                  |
| Goodness-of-fit on $F^2$                       | 1.049                                                         |
| Final R indexes [ $I \geq 2\sigma(I)$ ]        | $R_1 = 0.0370, wR_2 = 0.1048$                                 |
| Final R indexes [all data]                     | $R_1 = 0.0391, wR_2 = 0.1066$                                 |
| Largest diff. peak/hole / $e \text{ \AA}^{-3}$ | 0.79/-0.88                                                    |

---

### 3. NMR spectra of complexes 2, 3 and 5

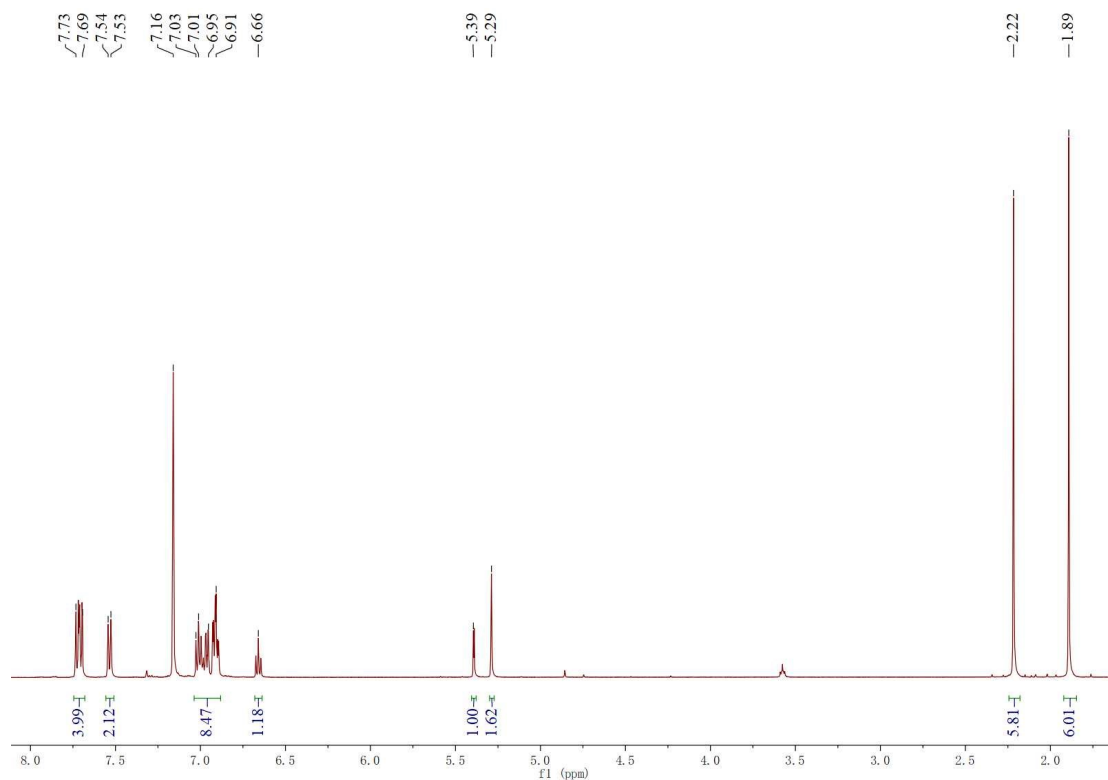

Fig. S1  $^1\text{H}$  NMR spectrum of zinc hydride LZnH (2) ( $\text{C}_6\text{D}_6$ )

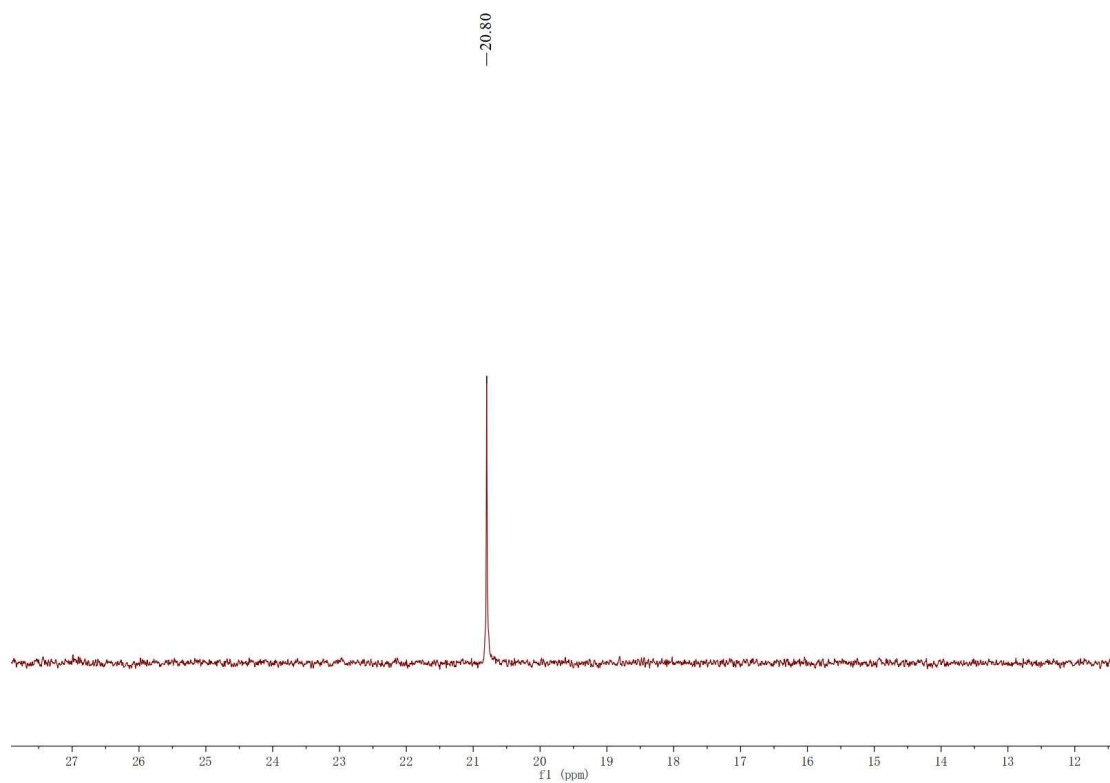

**Fig. S2** <sup>31</sup>P NMR spectrum of zinc hydride LZnH (2) (C<sub>6</sub>D<sub>6</sub>)

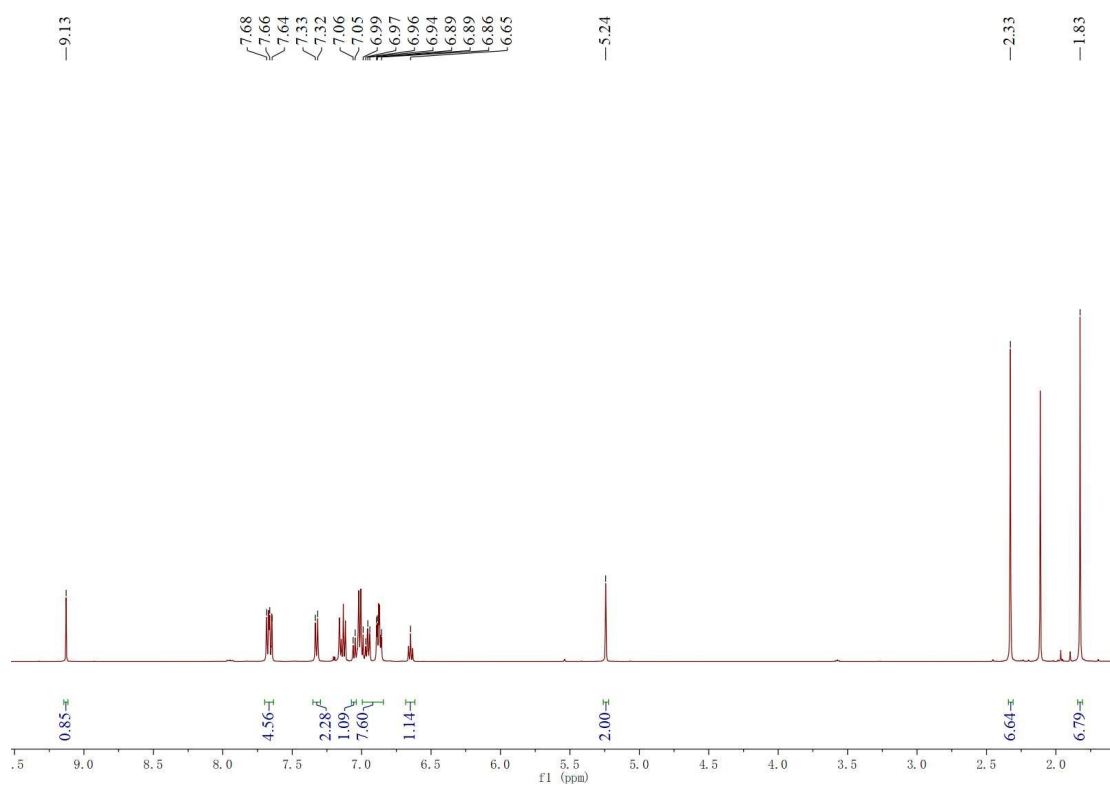

**Fig. S3** <sup>1</sup>H NMR spectrum of zinc formate complex LZnOCH(O) (3) (C<sub>6</sub>D<sub>6</sub>)

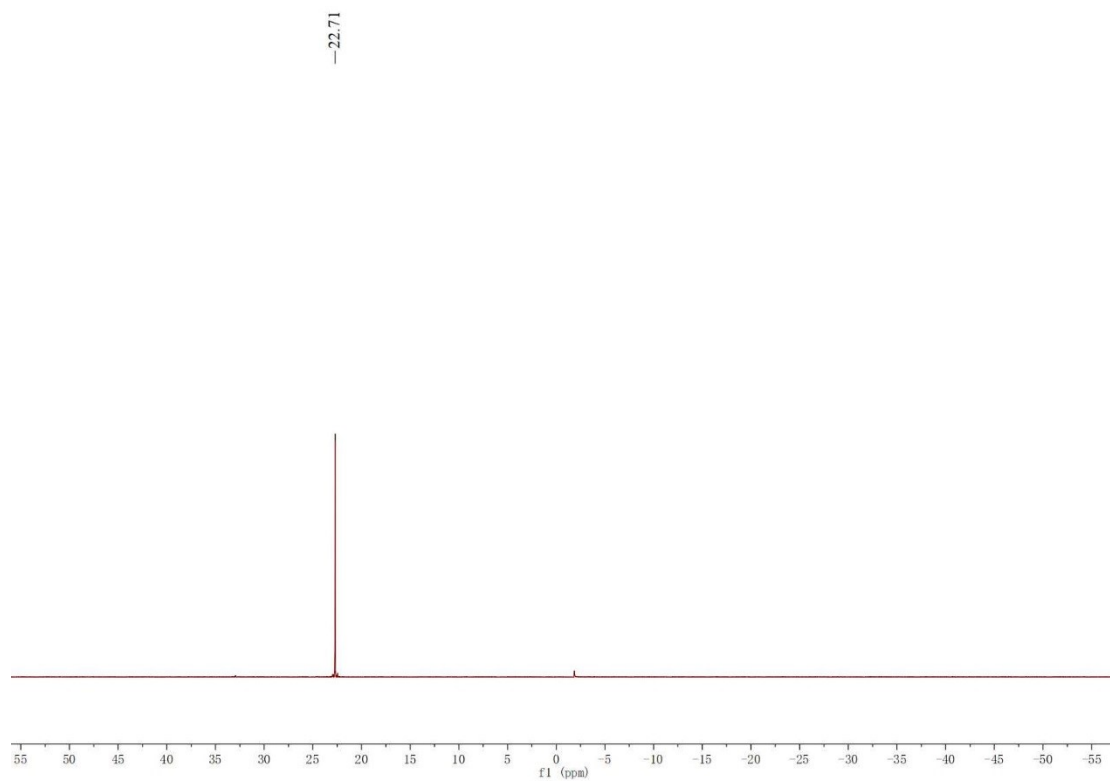

**Fig. S4** <sup>31</sup>P NMR spectrum of zinc formate complex LZnOCH(O) (3) (C<sub>6</sub>D<sub>6</sub>)

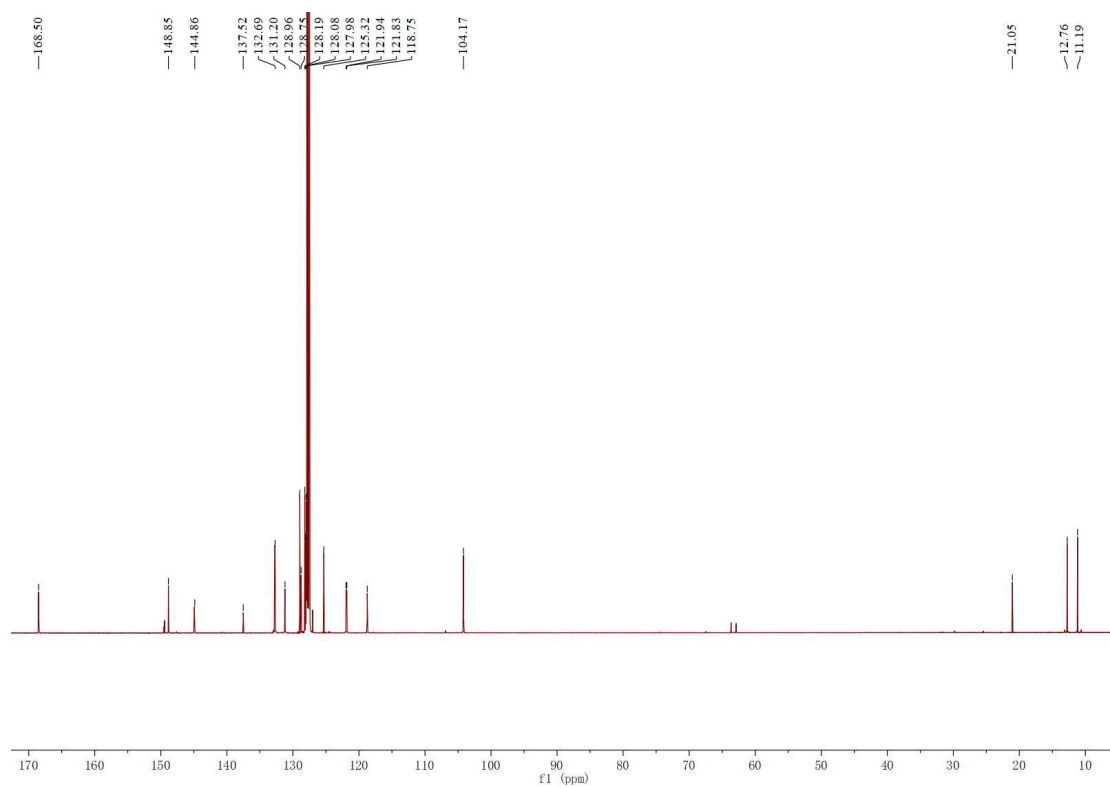

**Fig. S5** <sup>13</sup>C NMR spectrum of zinc formate complex LZnOCH(O) (3) (C<sub>6</sub>D<sub>6</sub>)

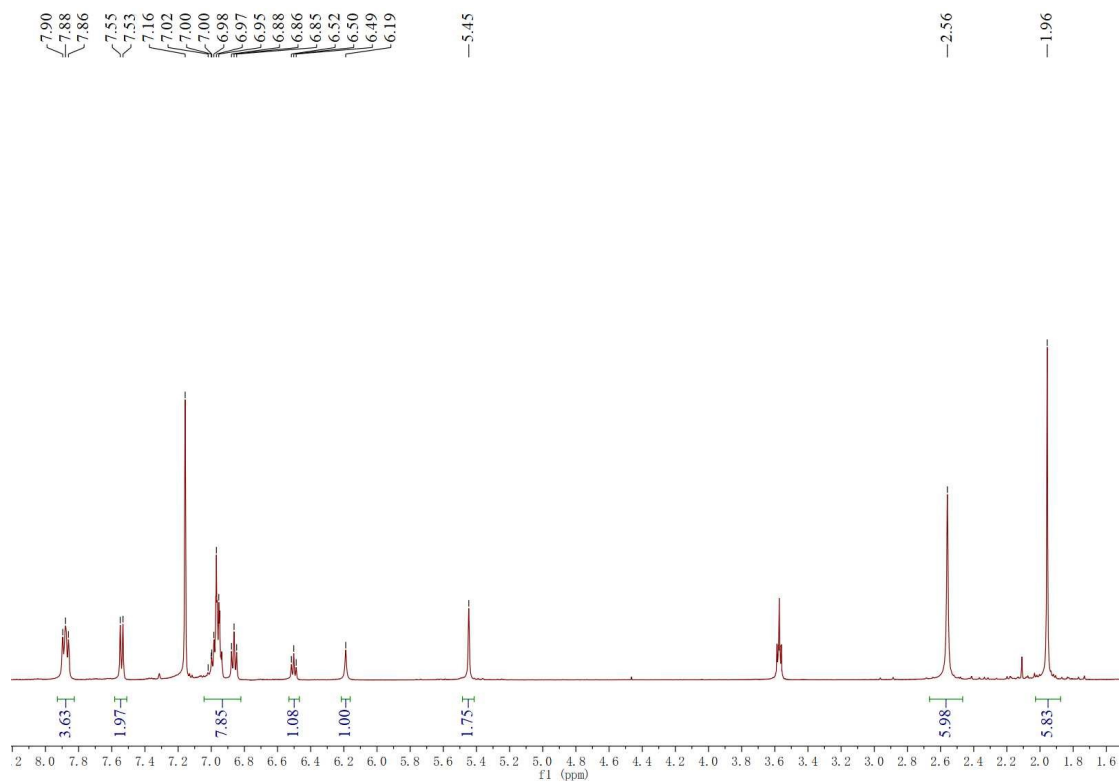

**Fig. S6**  $^1\text{H}$  NMR spectrum of magnesium hydride LMgH (**5**) ( $\text{C}_6\text{D}_6$ )

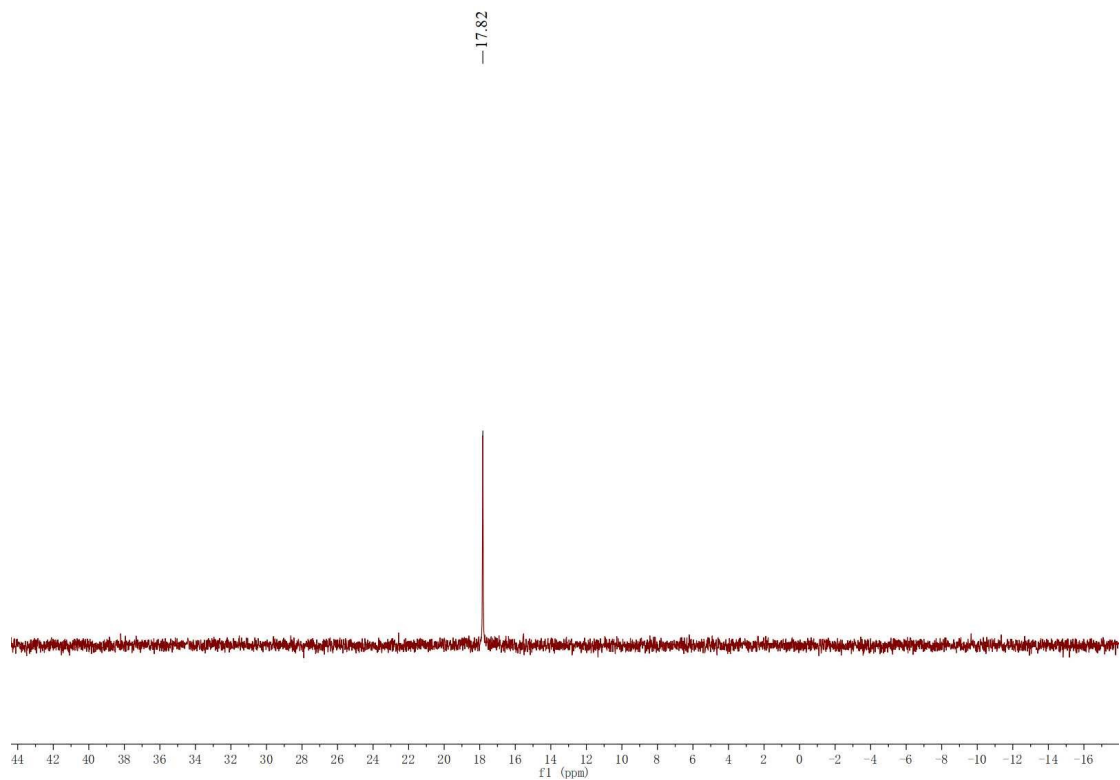

**Fig. S7**  $^{31}\text{P}$  NMR spectrum of magnesium hydride LMgH (**5**) ( $\text{C}_6\text{D}_6$ )

#### 4. $^1\text{H}$ NMR spectra of hydroboration of $\text{CO}_2$

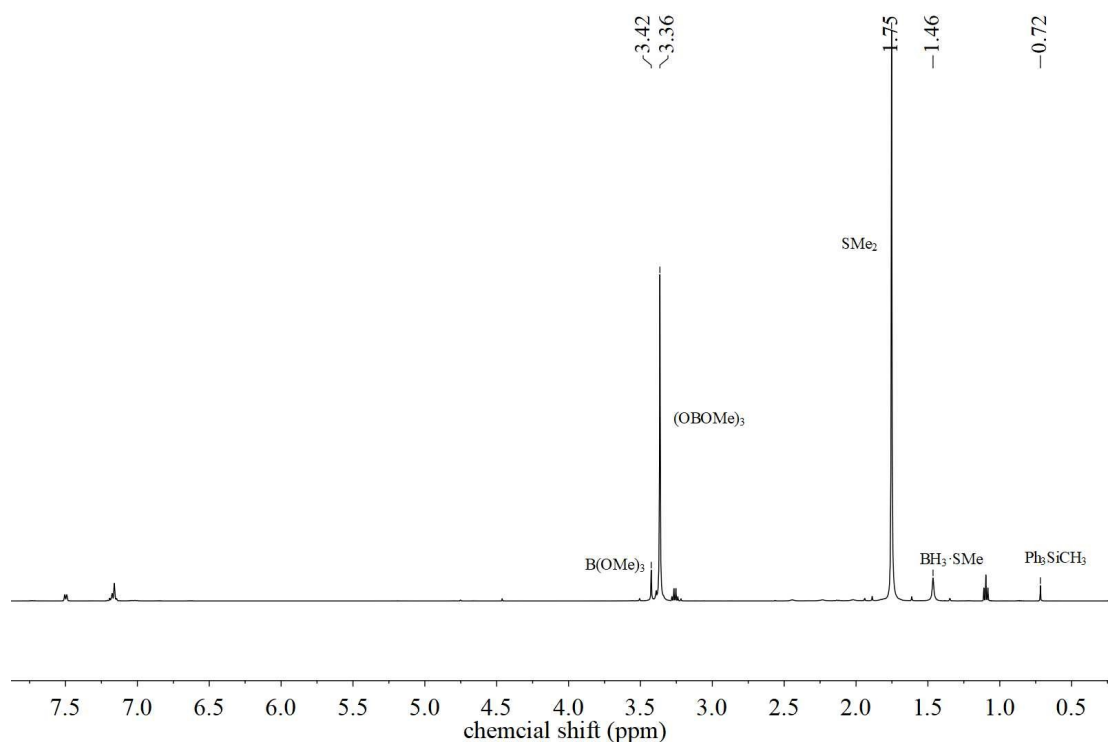

**Fig. S8** Typical <sup>1</sup>H NMR spectrum of the carbon dioxide reduction using BH<sub>3</sub>·SMe<sub>2</sub>. Incomplete reaction at 1/100 of **2**/ BH<sub>3</sub>·SMe<sub>2</sub>.

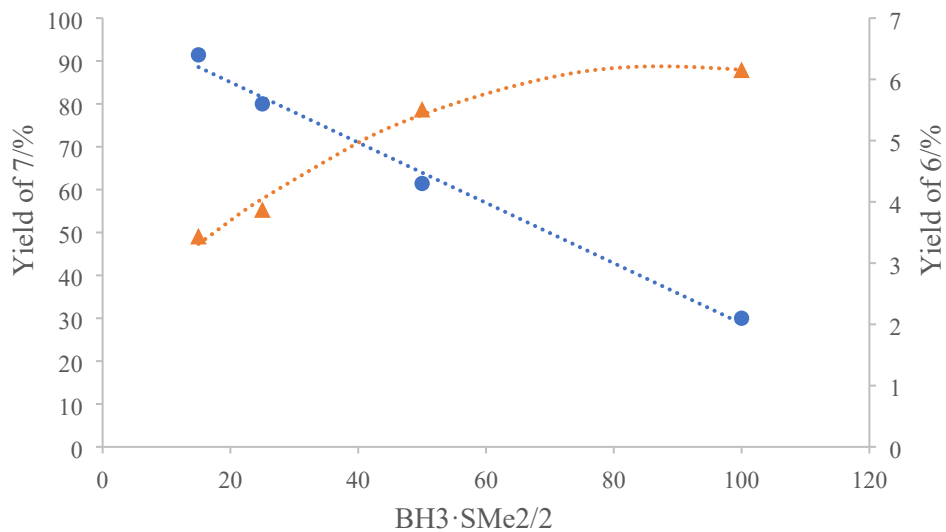

**Fig. S9** Plots of BH<sub>3</sub>·SMe<sub>2</sub> concentration versus yield (Table 1, run 2-run 5). (blue, B(OMe)<sub>3</sub>; orange, (OBOMe)<sub>3</sub>).

## 5. Kinetic study

Table S2. Hydroboration of CO<sub>2</sub> catalyzed by complex **2** at different time.

| Run <sup>a</sup> | Time (h) | Yield of 6 (%) <sup>b</sup> | Yield of 7 (%) <sup>b</sup> | Total (%) |
|------------------|----------|-----------------------------|-----------------------------|-----------|
| 1                | 0.5      | 1                           | 29                          | 30        |
| 2                | 1.5      | 1                           | 45                          | 46        |
| 3                | 3        | 2                           | 65                          | 67        |
| 4                | 4        | 3                           | 81                          | 84        |
| 5                | 8        | 4                           | 81                          | 85        |

<sup>a</sup> Reaction conditions: **2** (0.01mmol), **2**/BH<sub>3</sub>·SMe<sub>2</sub> = 1/50, T = 25°C, C<sub>6</sub>D<sub>6</sub> (1 ml), under ~2 atm CO<sub>2</sub>; <sup>b</sup> The yield was obtained by <sup>1</sup>H NMR using methyltriphenylsilane as an internal standard.

## 6. REFERENCES

- [1] SMART, Version 5.054; Bruker AXS Inc.: Madison, WI, 2000.
- [2] SAINT and SADABS, Version 6.22; Bruker AXS Inc.: Madison, WI, 2000.
- [3] Sheldrick, G. M. SHELXTL NT, Version 6.12; Bruker AXS Inc.: Madison, WI, 2000.
- [4] Chia C C, Teo Y C, Cham N, et al. Aluminum-Hydride-Catalyzed Hydroboration of Carbon Dioxide[J]. *Inorg Chem*, 2021, 60(7): 4569-4577.
- [5] Leong B X, Lee J, Li Y, et al. A Versatile NHC-Parent Silyliumylidene Cation for Catalytic Chemo- and Regioselective Hydroboration[J]. *J Am Chem Soc*, 2019, 141(44): 17629-17636.
